# Supplementary material
Source: publisher figshare collection journal article supplement (https://acs.figshare.com/ndownloader/files/4175653)
Supplement: Supplementary file 1 [file 4175653]

## Supporting Information

From Figure S1, the **IL** exhibits characteristic absorptions near  $1257\text{ cm}^{-1}$  (C-F stretching mode),  $1160\text{ cm}^{-1}$  (symmetric  $\text{SO}_2$  stretching mode) and  $640\text{ cm}^{-1}$  (SO bending mode) at room temperature (RT). Evident changes of the IR spectra are not found when the **IL** was heated to  $250\text{ }^{\circ}\text{C}$  for 1 h. Furthermore, as shown in Figure S2, the TGA thermogram performed under an  $\text{N}_2$  atmosphere with a heating rate of  $15\text{ }^{\circ}\text{C}/\text{min}$  clearly indicates the thermal stability of **IL** below  $300\text{ }^{\circ}\text{C}$ .

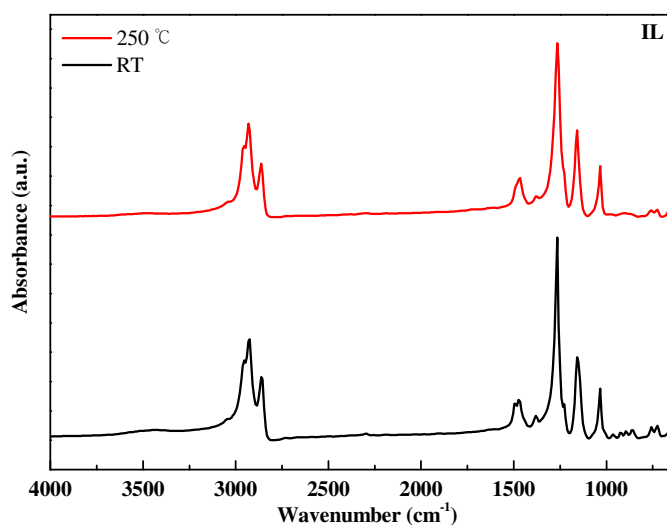

Figure S1. IR absorption spectra of **IL** at room temperature and  $250\text{ }^{\circ}\text{C}$ .

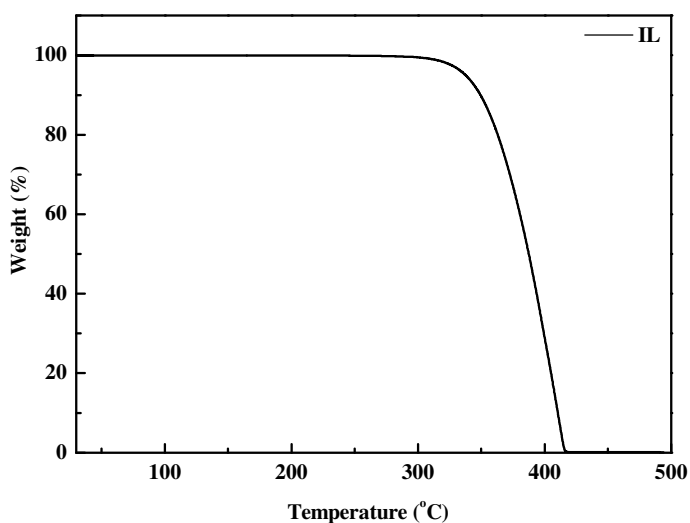

Figure S2. TGA curve of **IL** measured under an  $\text{N}_2$  atmosphere.

The **IL** can be easily removed by methanol. The as-synthesized polymers were carefully washed by ethyl ether and methanol before the elemental analysis. Thus, it is reasonable to believe that the probability of the presence of the residual **IL** in the polymers is very low (Figure S3).

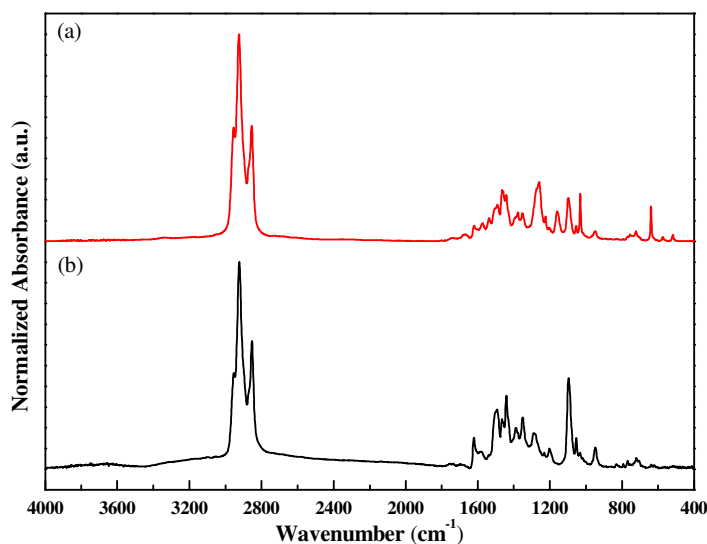

Figure S3. IR absorption spectra of **SQI<sub>5</sub>** before (a) and after (b) **IL** removing processes.

The use of **IL** in the synthesis makes **SQI<sub>x</sub>** polymers possible to cast continuous free-standing films with a large area ( $> 1 \times 1 \text{ cm}^2$ ). The **SQI<sub>0.1</sub>** film is much tougher and can be slightly folded as displayed in Figure S4.

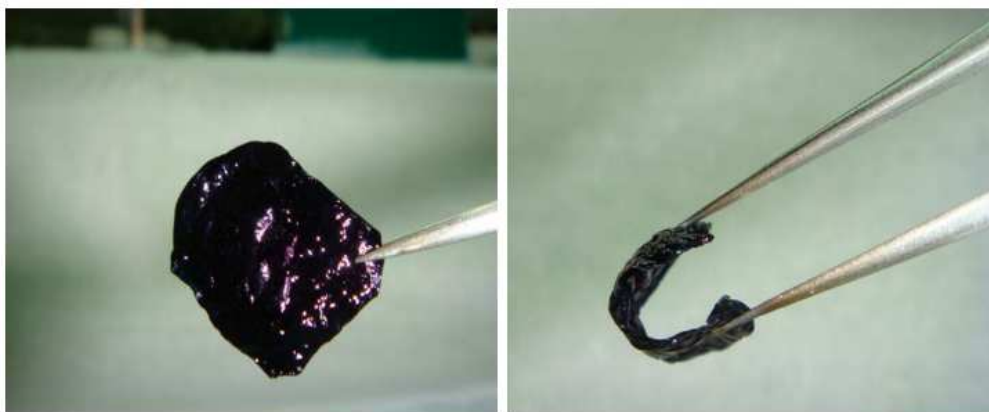

Figure S4. Photographs of flexible **SQI<sub>0.1</sub>** film.

To improve the solubility of **SQ**, we ultrasonically break the powders and then measure the absorption spectra after filtrating (filter paper: pore size = 3  $\mu\text{m}$ ).

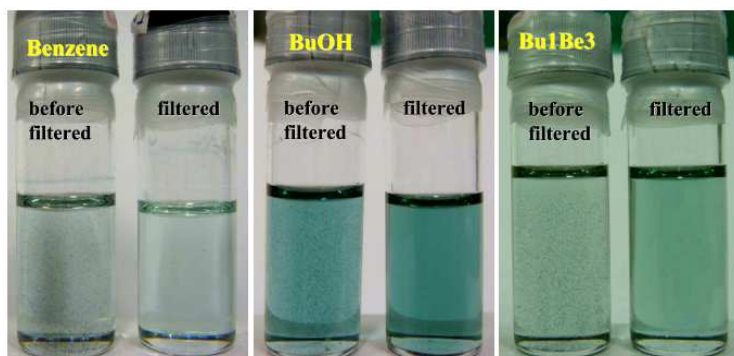

Figure S5. Photographs of **SQI<sub>0.01</sub>** before and after filtrating in various organic solvents. ‘Bu1Be3’ denotes a mixed solvent of BuOH/Benzene (1:3).

Table S1. The solubility of **SQ**, **SQI<sub>0.01</sub>** and **SQI<sub>5</sub>** in BuOH and Benzene.

|         | <b>SQ</b> | <b>SQI<sub>0.01</sub></b> | <b>SQI<sub>5</sub></b> |
|---------|-----------|---------------------------|------------------------|
| BuOH    | 0.00033   | 0.00043                   | 0.00050                |
| Benzene | 0.00047   | 0.00035                   | 0.00042                |

\*The unit of solubility is (g/ml).

\*\*The estimated concentration of the as-synthesized **SQI<sub>0.01</sub>** in the preparation solution of BuOH: Benzene (1:3) is ~0.05 g/ml.
